# Supplementary material for: Chronic cholesterol administration to the brain supports complete and long-lasting cognitive and motor amelioration in Huntington’s disease
Source: PubMed Central journal article supplement — Pharmacol Res. 2023 Aug;194:106823. doi: 10.1016/j.phrs.2023.106823 (PMC10463277; doi:10.1016/j.phrs.2023.106823), 2023-08
Supplement: mmc1.pdf [file mmc1.pdf]

# Supplementary Figure 1

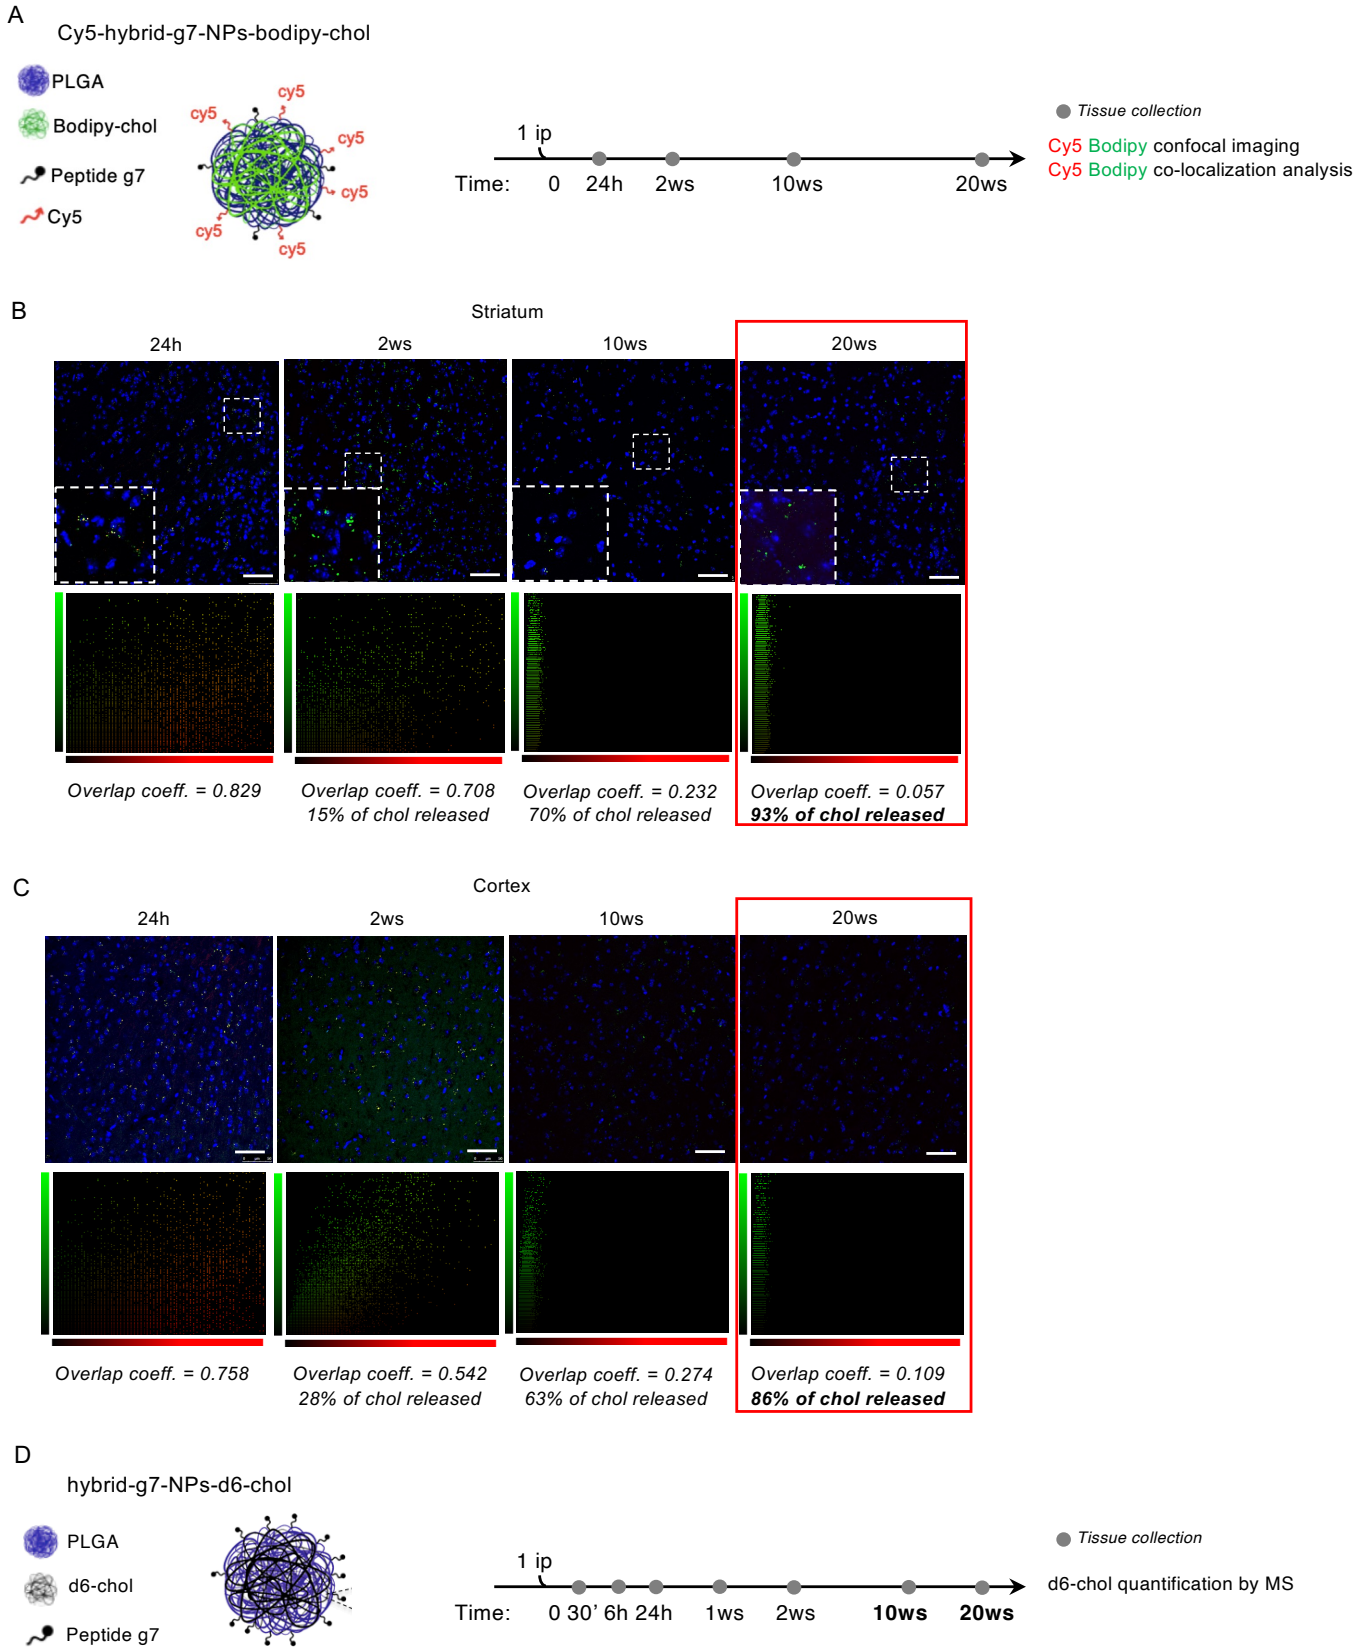

## Supplementary Figure 1. Cholesterol release and quantification by hybrid-g7-NPs-chol in wt mice over time.

**A** Experimental paradigm: wt mice ( $N = 4/\text{time point}$ ) were treated with a single ip injection of Cy5-hybrid-g7-NPs-bodipy-chol and sacrificed at different time points. Brains were collected for the analysis.

**B–C** Representative confocal images of brain slices (striatum in B, cortex in C) from wt mice after ip injection of hybrid-Cy5-g7-NPs-bodipy-chol sacrificed after 24 h, 2 weeks, 10 weeks or 20 weeks and relative co-localization of bodipy-chol and g7-NPs. Hoechst was used to counterstain nuclei (Ho, blue). Scale bar is 50  $\mu\text{m}$ .

**D** Experimental paradigm: wt mice ( $N = 4/\text{time point}$ ) were treated with a single ip injection of hybrid-g7-NPs-d6-chol and sacrificed at different time points. Different cerebral regions were collected for mass spectrometry analysis.

## Supplementary Figure 2

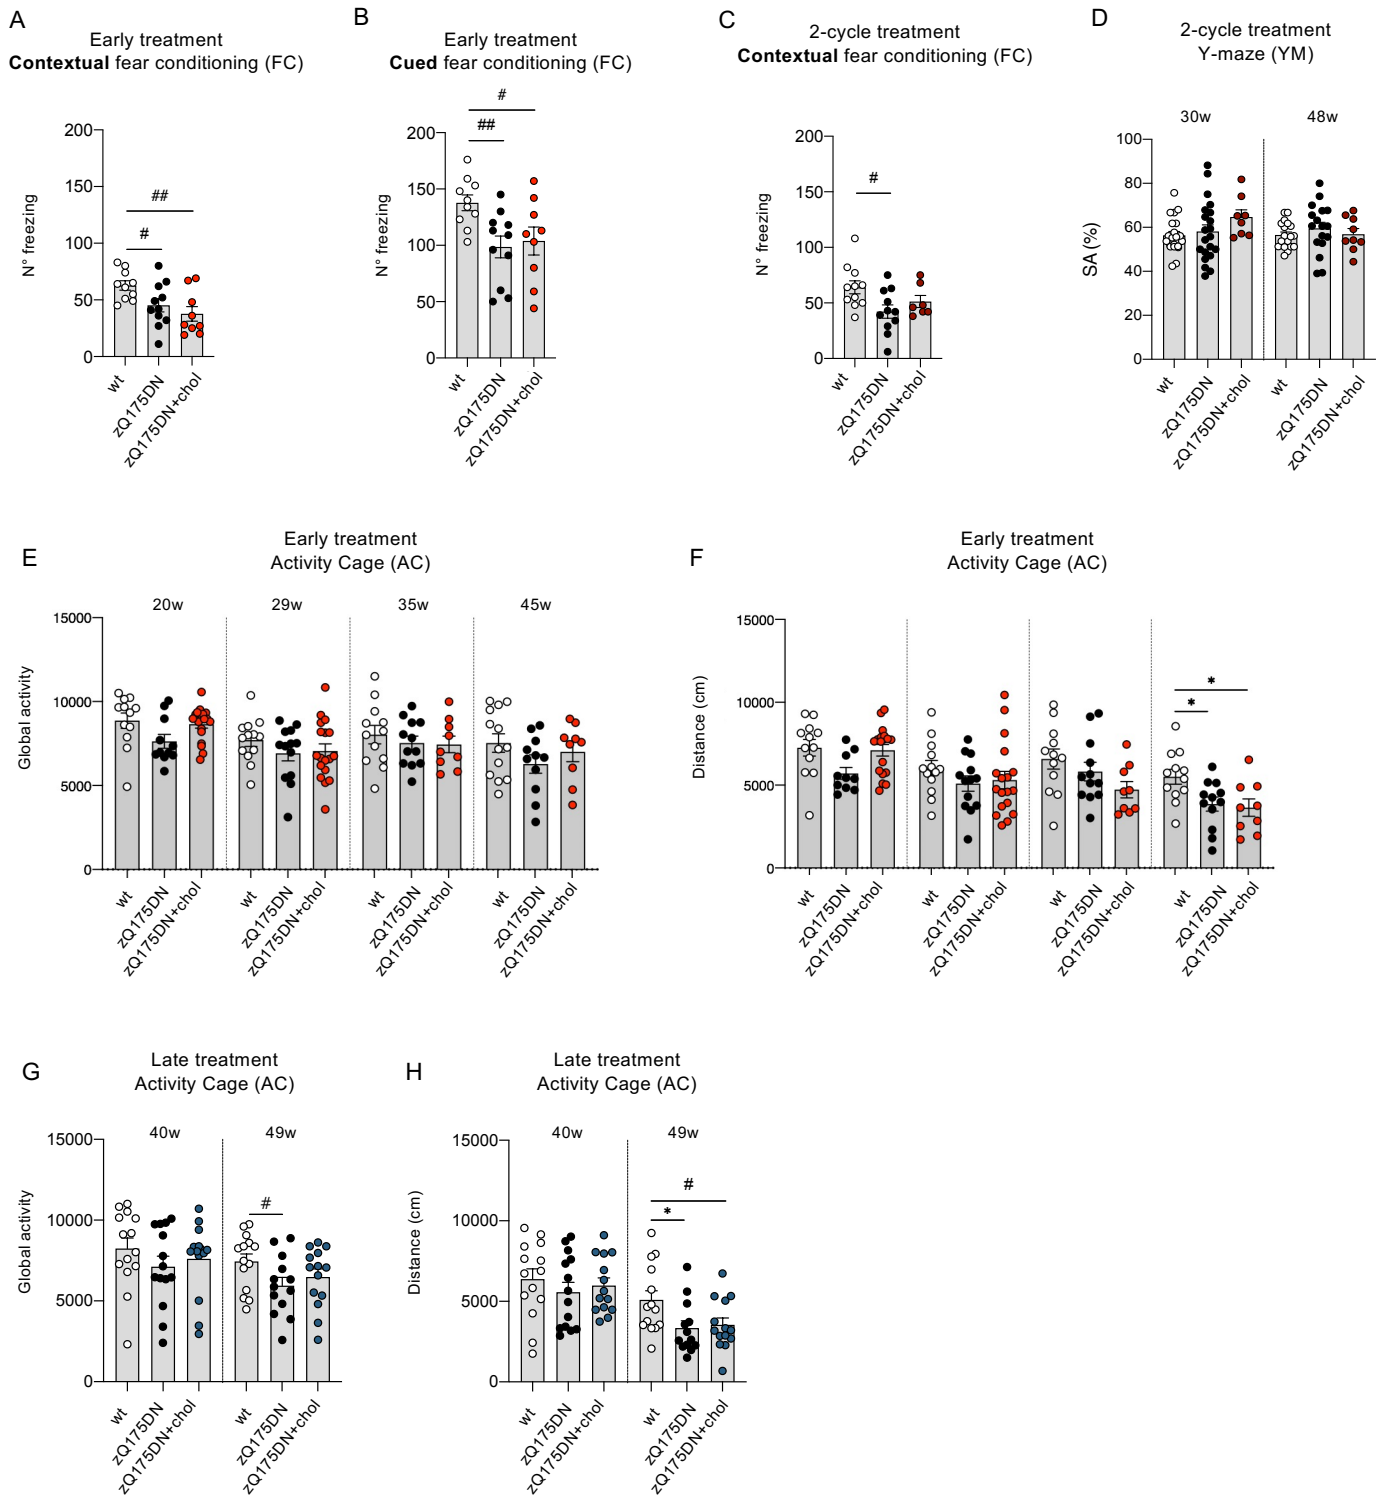

### Supplementary Figure 2. Cognitive and motor abilities of zQ175DN mice after the different treatments.

**A-B** N° of freezing in the fear conditioning (FC) test in the contextual (A) and cued paradigm (B) from the “early treatment” at 48 weeks of age.

**C** N° of freezing in the fear conditioning (FC) test in the contextual paradigm from the “2-cycle treatment” at 48 weeks of age.

**D** Y-maze (YM) test from the “2-cycle treatment” at 30-48 weeks of age. Spontaneous alternation (SA) was calculated by dividing the n° of alternations by n° of possible triads x 100.

**E-F** Global motor activity (E) and total distance traveled (in cm) (F) in an Activity Cage (AC) test from the “early treatment”.

**G-H** Global motor activity (G) and total distance traveled (in cm) (H) in an Activity Cage (AC) test from the “late treatment”.

Data information: data in A–H are shown as scatterplot graphs with mean±SEM. Each dot corresponds to the value obtained from each animal. Statistics: one-way ANOVA with Tuckey post-hoc test (\* $p < 0.05$ ); Student’s t-test ( $\#p < 0.05$ ;  $\#\#p < 0.01$ ).

# Supplementary Figure 3

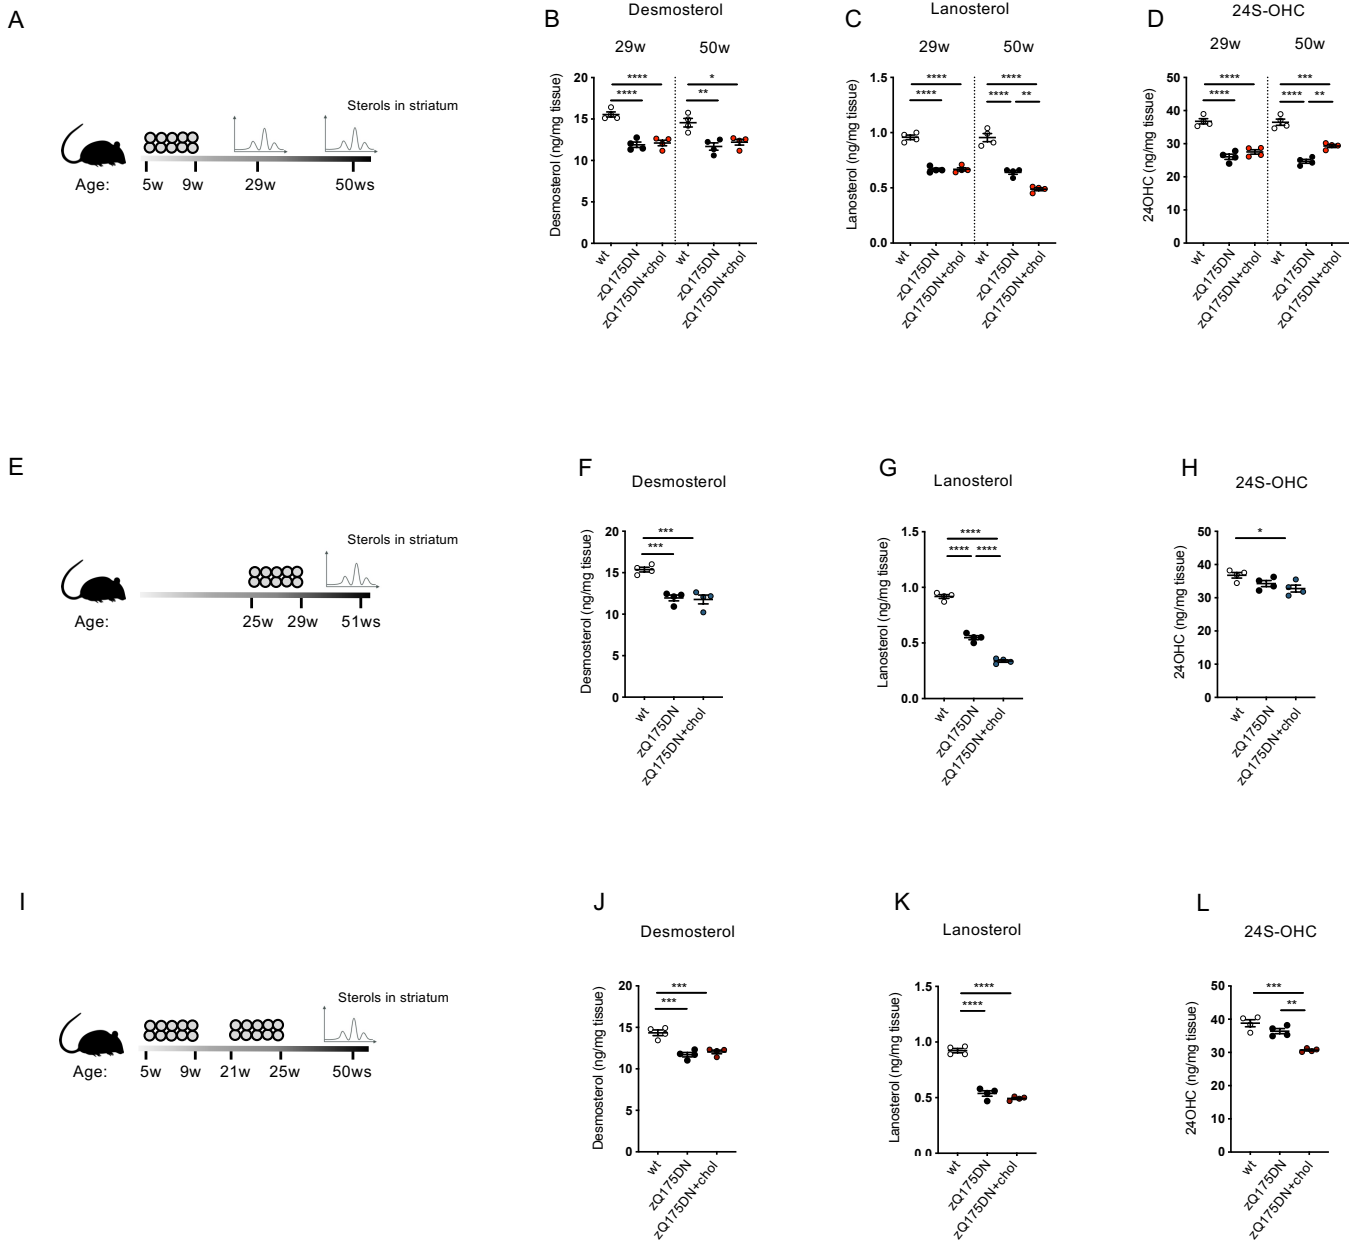

## Supplementary Figure 3. Sterols in the striatum of zQ175DN mice after the different treatments.

**A-D** Mass spectrometry analysis performed in the striatum from the “early treatment” ( $N = 4$  mice/group).

Scheme of the treatment (A); level of desmosterol (B), lanosterol (C), and 24S-OHC (D) in the striatum at 29 and 50 weeks.

**E-H** Mass spectrometry analysis performed in the striatum from the “late treatment” ( $N = 4$  mice/group).

Scheme of the treatment (E); level of desmosterol (F), lanosterol (G), and 24S-OHC (H) in the striatum at 51 weeks.

**I-L** Mass spectrometry analysis performed in the striatum from the “2-cycle treatment” ( $N = 4$  mice/group).

Scheme of the treatment (I); levels of desmosterol (J), lanosterol (K), and 24S-OHC (L) in the striatum at 50 weeks.

Data information: data in B–D, F–H, and J–L are shown as scatterplot graphs with mean±SEM. Each dot corresponds to the value obtained from each animal. Statistics: one-way ANOVA with Tuckey post-hoc test (\* $p < 0.05$ ; \*\* $p < 0.01$ ; \*\*\* $p < 0.001$ ; \*\*\*\* $p < 0.0001$ ).

# Supplementary Figure 4

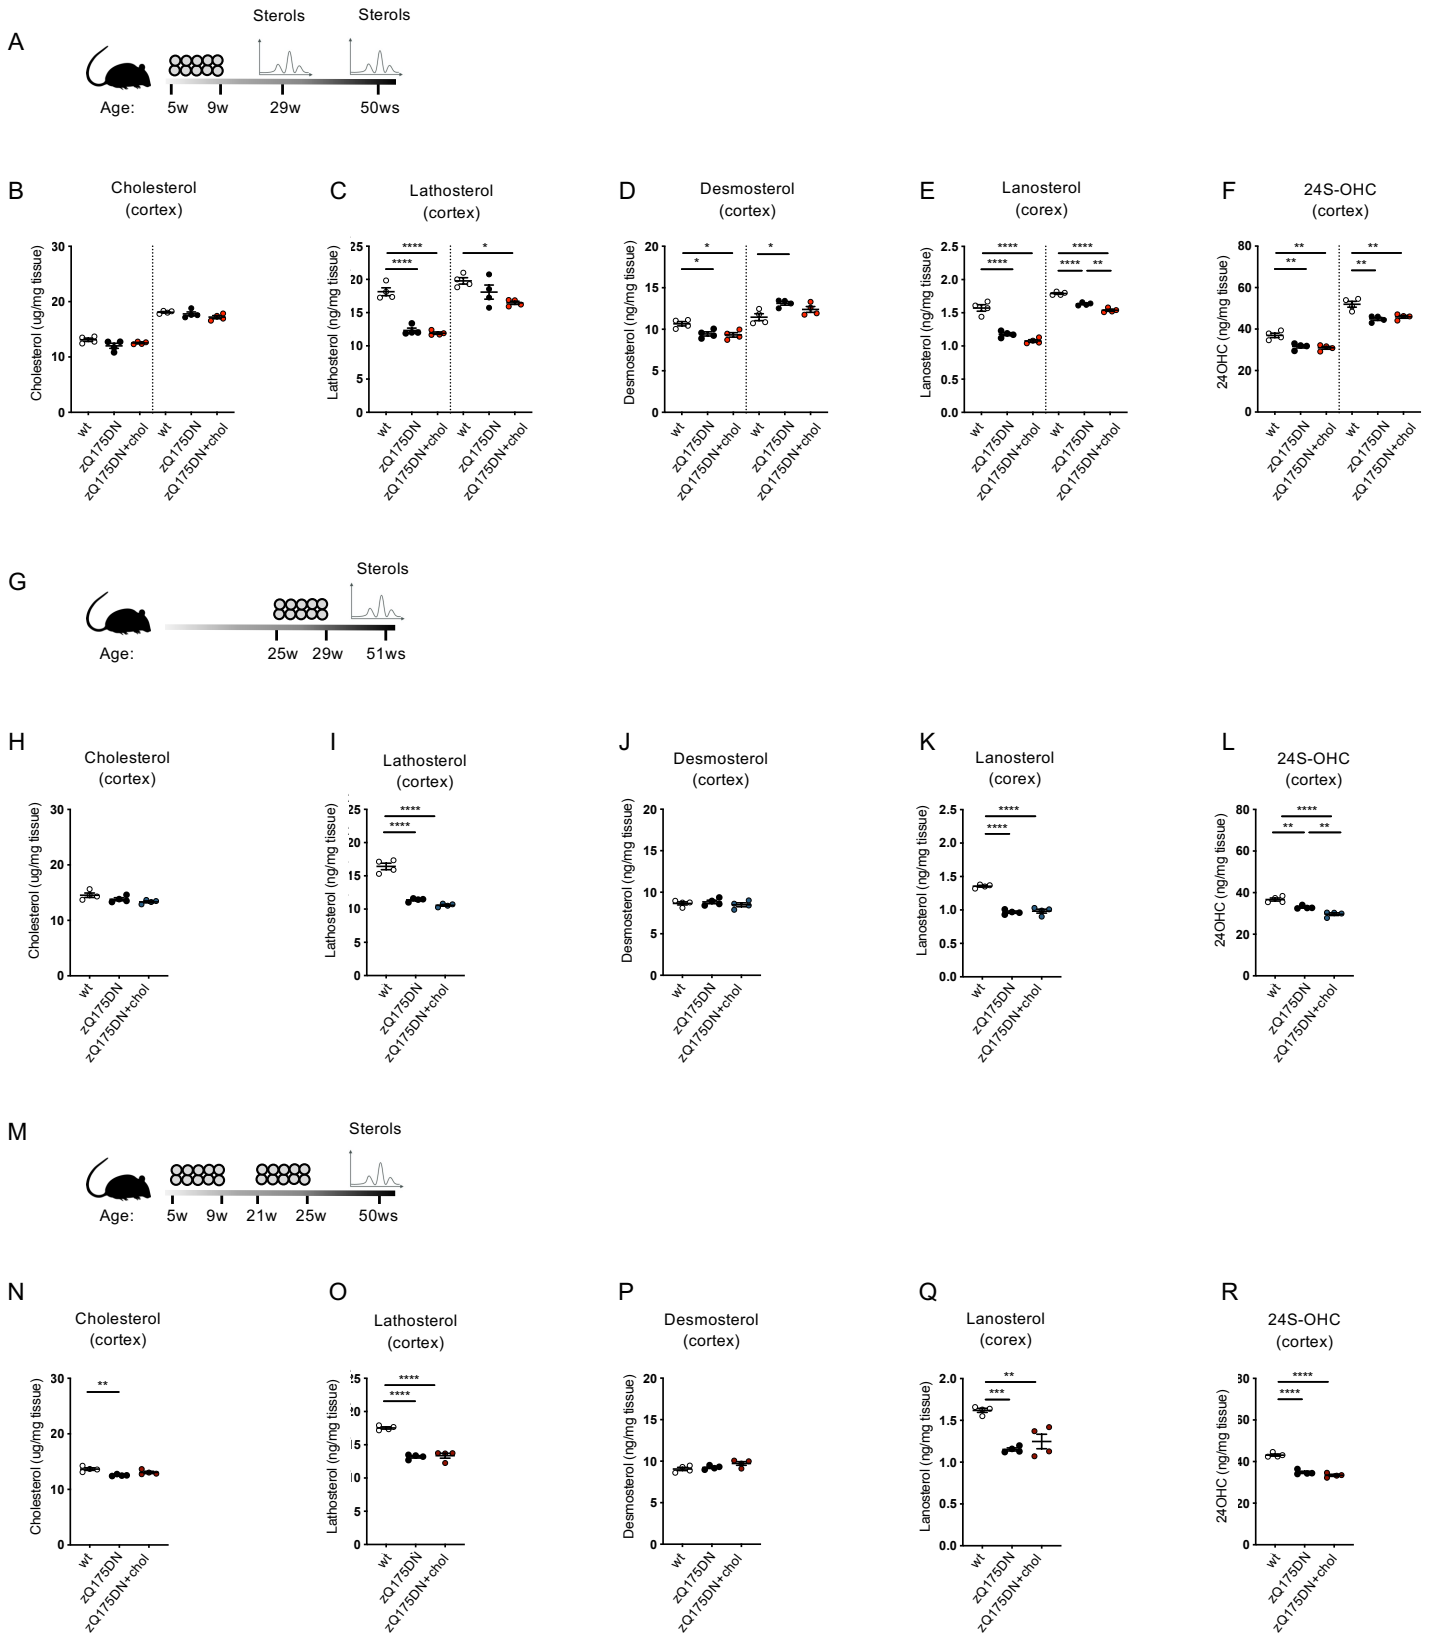

## Supplementary Figure 4. Sterols in the cortex of zQ175DN mice after the different treatments.

**A-F** Mass spectrometry analysis performed in the cortex from the “early treatment” ( $N = 4$  mice/group). Scheme of the treatment (A); level of cholesterol (B), lathosterol (C), desmosterol (D), lanosterol (E), and 24-hydroxycholesterol (F) in the cortex at 29 and 50 weeks.

**G-L** Mass spectrometry analysis performed in the cortex from the “late treatment” ( $N = 4$  mice/group). Scheme of the treatment (G); levels of cholesterol (H), lathosterol (I), desmosterol (J), lanosterol (K), and 24S-OHC (L) in the cortex at 51 weeks.

**M-R** Mass spectrometry analysis performed in the cortex from the “2-cycle treatment” ( $N = 4$  mice/group). Scheme of the treatment (M); level of cholesterol (N), lathosterol (O), desmosterol (P), lanosterol (Q), and 24S-OHC (R) in the cortex at 50 weeks.

Data information: data in B–F, H–L, and N–R are shown as scatterplot graphs with mean±SEM. Each dot corresponds to the value obtained from each animal. Statistics: one-way ANOVA with Tuckey post-hoc test (\* $p < 0.05$ ; \*\* $p < 0.01$ ; \*\*\* $p < 0.001$ ; \*\*\*\* $p < 0.0001$ ).

## Supplementary Figure 5

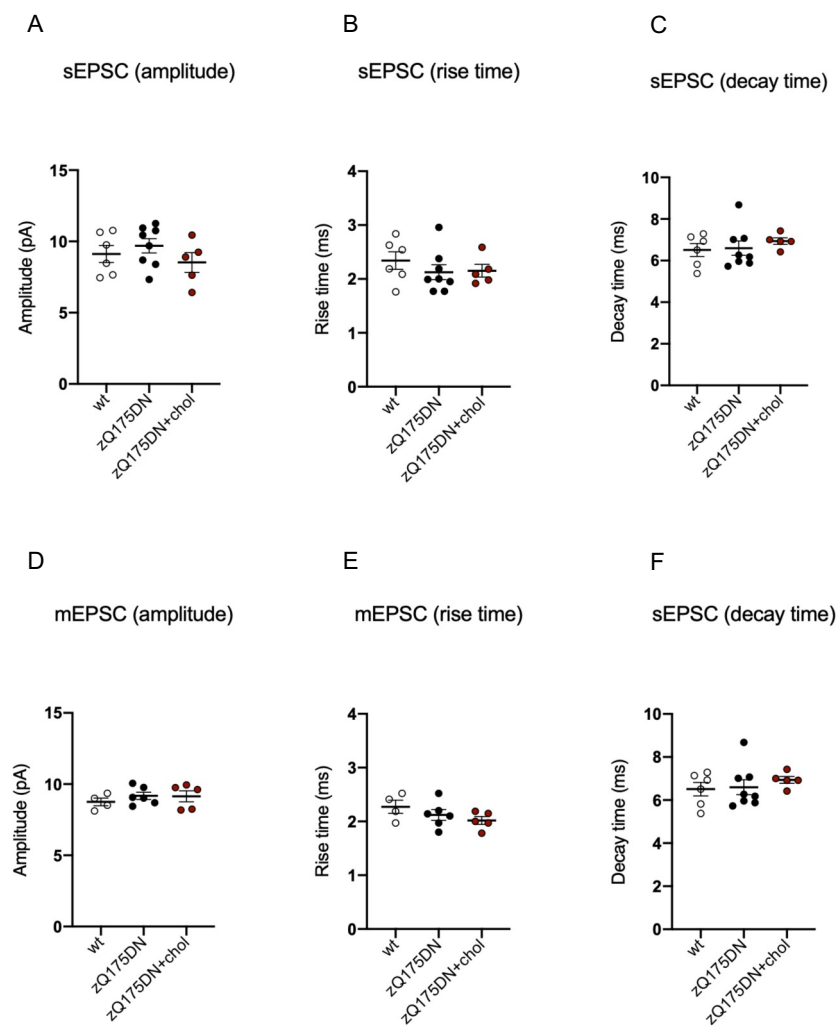

### Supplementary Figure 5. Electrophysiological features of MSNs from zQ175DN mice after the “2-cycle treatment”.

A–F Average amplitude, rise time, and decay time of sEPSCs (A–C) and mEPSCs (D–F) recorded from MSNs of wt (6 cells from  $N = 3$  mice), zQ175DN (8 cells from  $N = 4$  mice) and zQ175DN+chol mice (5 cells from  $N = 3$  mice).

Data information: data in A–F are shown as scatterplot graphs with mean $\pm$ SEM. Each dot corresponds to the value obtained from each cell.

## Supplementary Table 1

Level of d6-chol in striatum, cortex, cerebellum, liver, lung, kidney, and plasma measured by LC-MS ( $N = 3/\text{group}$ ).

Data information: data are expressed as mean $\pm$ SEM. Red boxes highlight values measured at 10 and 20 weeks after ip injection in each tissue. Data indicated with \* were previously published (Birolini et al., JCR 2021).

| Tissue     | 30* *                 | 6h *                  | 24h *                 | 1w *                  | 2w *                  | 10w                   | 20w                   |
|------------|-----------------------|-----------------------|-----------------------|-----------------------|-----------------------|-----------------------|-----------------------|
|            | Concentration (ng/mg) |
| Striatum   | 0,11 $\pm$ 0,069      | 0,38 $\pm$ 0,13       | 0,45 $\pm$ 0,10       | 1,18 $\pm$ 0,04       | 1,71 $\pm$ 0,27       | 0,65 $\pm$ 0,06       | 0,38 $\pm$ 0,08       |
| Cortex     | 0,00 $\pm$ 0,00       | 0,24 $\pm$ 0,06       | 0,36 $\pm$ 0,07       | 1,04 $\pm$ 0,16       | 1,38 $\pm$ 0,55       | 0,55 $\pm$ 0,03       | 0,38 $\pm$ 0,09       |
| Cerebellum | 0,00 $\pm$ 0,00       | 0,25 $\pm$ 0,10       | 0,43 $\pm$ 0,17       | 1,17 $\pm$ 0,07       | 1,40 $\pm$ 0,59       | 0,64 $\pm$ 0,18       | 0,50 $\pm$ 0,08       |
| Liver      | 35,45 $\pm$ 15,34     | 15,01 $\pm$ 6,69      | 7,38 $\pm$ 2,34       | 7,88 $\pm$ 0,83       | 2,81 $\pm$ 1,31       | 0,03 $\pm$ 0,01       | 0,03 $\pm$ 0,03       |
| Lung       | 0,53 $\pm$ 0,32       | 3,66 $\pm$ 0,86       | 6,79 $\pm$ 2,08       | 11,07 $\pm$ 5,94      | 4,89 $\pm$ 4,42       | 0,05 $\pm$ 0,01       | 0,01 $\pm$ 0,001      |
| Kidney     | 1,85 $\pm$ 1,00       | 4,47 $\pm$ 2,42       | 6,30 $\pm$ 4,72       | 8,80 $\pm$ 0,12       | 5,02 $\pm$ 2,01       | 0,07 $\pm$ 0,01       | 0,06 $\pm$ 0,05       |
| Plasma     | 89,73 $\pm$ 15,36     | 711,3 $\pm$ 117,00    | 893,30 $\pm$ 300,50   | 616,67 $\pm$ 136,24   | 317,67 $\pm$ 176,00   | 0,00 $\pm$ 0,00       | 0,01 $\pm$ 0,01       |

## Supplementary Table 2

Number of animals used in each test performed in all the trials of this study.

|                                     | Early treatment |     |     |        |         |     |     |        |              |     |     |        | n. of tests performed (total) |
|-------------------------------------|-----------------|-----|-----|--------|---------|-----|-----|--------|--------------|-----|-----|--------|-------------------------------|
|                                     | wt              |     |     |        | zQ175DN |     |     |        | zQ175DN+chol |     |     |        |                               |
|                                     | 20w             | 29w | 35w | 45-48w | 20w     | 29w | 35w | 45-48w | 20w          | 29w | 35w | 45-48w |                               |
| Novel Object Recognition test (NOR) | 13              | 13  | 12  | 12     | 10      | 13  | 12  | 12     | 18           | 18  | 9   | 9      | 151                           |
| Paw Clasp test (PC)                 | 13              | 12  | 12  | 12     | 11      | 13  | 12  | 12     | 18           | 18  | 9   | 9      | 151                           |
| Grip Strength test (GC)             | 13              | 13  | 12  | 12     | 11      | 13  | 12  | 12     | 18           | 18  | 9   | 9      | 152                           |
| Activity Cage test (AC)             | 13              | 13  | 12  | 12     | 10      | 13  | 12  | 12     | 18           | 18  | 9   | 9      | 151                           |
| Rotarod test (RR)                   | -               | -   | -   | 13     | -       | -   | -   | 13     | -            | -   | -   | 9      | 35                            |
| Fear Conditioning test (FC)         | -               | -   | -   | 10     | -       | -   | -   | 11     | -            | -   | -   | 9      | 30                            |

|                                     | Late treatment |        |         |        |              |        | n. of tests performed (total) |
|-------------------------------------|----------------|--------|---------|--------|--------------|--------|-------------------------------|
|                                     | wt             |        | zQ175DN |        | zQ175DN+chol |        |                               |
|                                     | 40w            | 49-51w | 40w     | 49-51w | 40w          | 49-51w |                               |
| Novel Object Recognition test (NOR) | 14             | 14     | 14      | 13     | 14           | 14     | 83                            |
| Paw Clasp test (PC)                 | 14             | 14     | 14      | 13     | 14           | 14     | 83                            |
| Grip Strength test (GC)             | 14             | 14     | 14      | 13     | 14           | 14     | 83                            |
| Activity Cage test (AC)             | 14             | 14     | 14      | 13     | 14           | 14     | 83                            |
| Rotarod test (RR)                   | -              | 14     | -       | 13     | -            | 14     | 41                            |
| Fear Conditioning test (FC)         | -              | 13     | -       | 13     | -            | 13     | 39                            |

|                                     | 2-cycle treatment |        |     |        |         |        |     |        |              |        |     |        | n. of tests performed (total) |
|-------------------------------------|-------------------|--------|-----|--------|---------|--------|-----|--------|--------------|--------|-----|--------|-------------------------------|
|                                     | wt                |        |     |        | zQ175DN |        |     |        | zQ175DN+Chol |        |     |        |                               |
|                                     | 20w               | 29-30w | 35w | 45-48w | 20w     | 29-30w | 35w | 45-48w | 20w          | 29-30w | 35w | 45-48w |                               |
| Novel Object Recognition test (NOR) | 15                | 18     | 19  | 18     | 13      | 17     | 18  | 18     | 17           | 17     | 17  | 17     | 204                           |
| Paw Clasp test (PC)                 | 15                | 18     | 19  | 18     | 13      | 17     | 18  | 18     | 17           | 17     | 17  | 17     | 204                           |
| Grip Strength test (GC)             | 15                | 18     | 19  | 18     | 13      | 17     | 18  | 18     | 17           | 17     | 17  | 17     | 204                           |
| Activity Cage test (AC)             | 15                | 18     | 19  | 18     | 13      | 16     | 18  | 18     | 17           | 17     | 17  | 17     | 203                           |
| Rotarod test (RR)                   | -                 | -      | -   | 17     | -       | -      | -   | 13     | -            | -      | -   | 17     | 47                            |
| Fear Conditioning test (FC)         | -                 | -      | -   | 11     | -       | -      | -   | 11     | -            | -      | -   | 7      | 29                            |
| Y-maze test (YM)                    | -                 | 21     | -   | 18     | -       | 21     | -   | 17     | -            | 8      | -   | 9      | 94                            |

## Supplementary Table 3

Quantification of the n° of muHTT aggregates in brain coronal slices of HD mice to measure the effect of the different strategies aimed at restoring cholesterol level/synthesis at the time points where a behavioural effect was observed. The mean values for each group were normalized to 100.

| R6/2_SREBP2 gene therapy                      |                                         |                                                 |                                           | R6/2_minipumps                             |                                      |                                            |                                      | R6/2_NPs            |                                   |                                     |
|-----------------------------------------------|-----------------------------------------|-------------------------------------------------|-------------------------------------------|--------------------------------------------|--------------------------------------|--------------------------------------------|--------------------------------------|---------------------|-----------------------------------|-------------------------------------|
| R6/2 + AAV-Tom<br>Contralateral<br>hemisphere | R6/2 + AAV-Tom<br>Infused<br>hemisphere | R6/2 + AAV-hBHP2<br>Contralateral<br>hemisphere | R6/2 + AAV-hBHP2<br>Infused<br>hemisphere | R6/2 + ACSF<br>Contralateral<br>hemisphere | R6/2 + ACSF<br>Infused<br>hemisphere | R6/2 + Chol<br>Contralateral<br>hemisphere | R6/2 + Chol<br>Infused<br>hemisphere | R6/2<br>+<br>saline | R6/2<br>+<br>g7-PLGA-NPs-<br>chol | R6/2<br>+<br>g7-hybrid-NPs-<br>chol |
| 104                                           | 122                                     | 71                                              | 88                                        | 38                                         | 94                                   | 97                                         | 23                                   | 142                 | 97                                | 52                                  |
| 120                                           | 85                                      | 119                                             | 96                                        | 108                                        | 33                                   | 56                                         | 18                                   | 75                  | 138                               | 112                                 |
| 118                                           | 71                                      | 90                                              | 94                                        | 73                                         | 54                                   | 56                                         | 32                                   | 157                 | 64                                | 106                                 |
| 50                                            | 87                                      | 81                                              | 82                                        | 105                                        | 49                                   | 56                                         | 41                                   | 106                 | 151                               | 130                                 |
| 62                                            | 85                                      | 73                                              | 84                                        | 41                                         | 39                                   | 76                                         | 23                                   | 90                  | 68                                | 132                                 |
| 58                                            | 74                                      | 77                                              | 58                                        | 80                                         | 54                                   | 56                                         | 51                                   | 81                  | 64                                | 46                                  |
| 133                                           | 84                                      | 136                                             | 147                                       | 26                                         | 33                                   | 38                                         | 25                                   | 129                 | 70                                | 147                                 |
| 169                                           | 49                                      | 127                                             | 121                                       | 11                                         | 25                                   | 14                                         | 32                                   | 141                 | 54                                | 100                                 |
| 85                                            | 139                                     | 127                                             | 155                                       | 153                                        | 36                                   | 351                                        | 29                                   | 81                  | 109                               | 66                                  |
| 139                                           | 86                                      | 134                                             | 123                                       | 48                                         | 50                                   | 243                                        | 17                                   | 133                 | 76                                | 84                                  |
| 116                                           | 96                                      | 82                                              | 119                                       | 157                                        | 121                                  | 32                                         | 23                                   | 140                 | 95                                | 123                                 |
| 85                                            | 97                                      | 137                                             | 123                                       | 270                                        | 31                                   | 8                                          | 11                                   | 83                  | 74                                | 54                                  |
| 123                                           | 102                                     | 82                                              | 79                                        | 90                                         | 113                                  | 123                                        | 1                                    | 62                  | 117                               | 49                                  |
| 110                                           | 64                                      | 91                                              | 94                                        | 242                                        | 112                                  | 352                                        | 2                                    | 83                  | 79                                | 118                                 |
| 97                                            | 66                                      | 65                                              | 65                                        | 264                                        | 81                                   | 188                                        | 2                                    | 74                  | 66                                | 134                                 |
| 75                                            | 99                                      | 100                                             | 84                                        | 52                                         | 117                                  | 39                                         | 0                                    | 78                  | 88                                | 104                                 |
| 56                                            | 95                                      | 102                                             | 90                                        | 75                                         | 125                                  | 277                                        | 0                                    | 89                  | 133                               | 101                                 |
| 56                                            | 87                                      | 108                                             | 89                                        | 68                                         | 124                                  | 45                                         | 2                                    | 90                  | 76                                | 73                                  |
| 70                                            | 95                                      | 108                                             | 69                                        | 106                                        | 45                                   | 68                                         | 12                                   | 70                  | 86                                | 108                                 |
| 83                                            | 67                                      | 125                                             | 92                                        | 113                                        | 28                                   | 44                                         | 44                                   | 84                  | 85                                | 95                                  |
| 113                                           | 75                                      | 99                                              | 42                                        | 33                                         | 47                                   | 57                                         | 44                                   | 131                 | 82                                | 122                                 |
| 86                                            | 68                                      | 80                                              | 32                                        | 48                                         | 158                                  | 64                                         | 14                                   | 117                 | 91                                | 109                                 |
| 92                                            | 121                                     | 97                                              | 59                                        | 152                                        | 197                                  | 92                                         | 17                                   | 72                  | 108                               | 131                                 |
| 119                                           | 102                                     | 81                                              | 71                                        | 72                                         | 118                                  | 41                                         | 35                                   | 140                 | 113                               | 81                                  |
| 136                                           | 111                                     | 99                                              | 47                                        | 77                                         | 97                                   | 55                                         | 14                                   | 67                  | 110                               | 97                                  |
| 145                                           | 114                                     | 119                                             | 34                                        |                                            | 19                                   | 75                                         | 13                                   | 104                 | 121                               | 115                                 |
|                                               | 141                                     | 94                                              | 28                                        |                                            | 165                                  |                                            | 22                                   | 80                  | 111                               | 130                                 |
|                                               |                                         | 117                                             | 75                                        |                                            |                                      |                                            |                                      |                     |                                   |                                     |
|                                               |                                         | 89                                              | 79                                        |                                            |                                      |                                            |                                      |                     |                                   |                                     |
|                                               |                                         | 150                                             | 42                                        |                                            |                                      |                                            |                                      |                     |                                   |                                     |
|                                               |                                         | 60                                              | 55                                        |                                            |                                      |                                            |                                      |                     |                                   |                                     |
|                                               |                                         | 103                                             | 78                                        |                                            |                                      |                                            |                                      |                     |                                   |                                     |
|                                               |                                         | 72                                              | 8                                         |                                            |                                      |                                            |                                      |                     |                                   |                                     |
|                                               |                                         | 106                                             | 27                                        |                                            |                                      |                                            |                                      |                     |                                   |                                     |
|                                               |                                         | 121                                             | 49                                        |                                            |                                      |                                            |                                      |                     |                                   |                                     |
|                                               |                                         | 83                                              | 51                                        |                                            |                                      |                                            |                                      |                     |                                   |                                     |
|                                               |                                         | 112                                             | 47                                        |                                            |                                      |                                            |                                      |                     |                                   |                                     |
|                                               |                                         | 85                                              | 63                                        |                                            |                                      |                                            |                                      |                     |                                   |                                     |
|                                               |                                         | 68                                              | 44                                        |                                            |                                      |                                            |                                      |                     |                                   |                                     |
|                                               |                                         | 114                                             | 60                                        |                                            |                                      |                                            |                                      |                     |                                   |                                     |
|                                               |                                         | 106                                             | 72                                        |                                            |                                      |                                            |                                      |                     |                                   |                                     |
|                                               |                                         | 120                                             | 83                                        |                                            |                                      |                                            |                                      |                     |                                   |                                     |
|                                               |                                         | 98                                              | 55                                        |                                            |                                      |                                            |                                      |                     |                                   |                                     |
|                                               |                                         | 94                                              | 55                                        |                                            |                                      |                                            |                                      |                     |                                   |                                     |
|                                               |                                         | 103                                             |                                           |                                            |                                      |                                            |                                      |                     |                                   |                                     |

| zQ175DN_g7-hybrid-NPs-<br>chol             |                                         |                                            |                                         |                                           |                                        |                                               |                                            |
|--------------------------------------------|-----------------------------------------|--------------------------------------------|-----------------------------------------|-------------------------------------------|----------------------------------------|-----------------------------------------------|--------------------------------------------|
| zQ175DN + saline<br>Early treatment<br>29w | zQ175DN + NPs<br>Early treatment<br>29w | zQ175DN + saline<br>Early treatment<br>50w | zQ175DN + NPs<br>Early treatment<br>50w | zQ175DN + saline<br>Late treatment<br>51w | zQ175DN + NPs<br>Late treatment<br>51w | zQ175DN + saline<br>2 cycles treatment<br>50w | zQ175DN + NPs<br>2 cycles treatment<br>50w |
| 85                                         | 58                                      | 39                                         | 81                                      | 69                                        | 5                                      | 128                                           | 1                                          |
| 73                                         | 85                                      | 62                                         | 181                                     | 94                                        | 35                                     | 104                                           | 5                                          |
| 94                                         | 74                                      | 113                                        | 167                                     | 88                                        | 75                                     | 74                                            | 4                                          |
| 117                                        | 104                                     | 85                                         | 73                                      | 67                                        | 62                                     | 116                                           | 6                                          |
| 98                                         | 92                                      | 75                                         | 95                                      | 79                                        | 19                                     | 94                                            | 4                                          |
| 104                                        | 98                                      | 86                                         | 142                                     | 98                                        | 83                                     | 83                                            | 6                                          |
| 100                                        | 86                                      | 118                                        | 133                                     | 77                                        | 49                                     | 83                                            | 7                                          |
| 119                                        | 76                                      | 84                                         | 137                                     | 100                                       | 132                                    | 141                                           | 3                                          |
| 88                                         | 82                                      | 98                                         | 149                                     | 82                                        | 88                                     | 73                                            | 2                                          |
| 134                                        | 79                                      | 97                                         | 51                                      | 123                                       | 48                                     | 120                                           | 6                                          |
| 163                                        | 98                                      | 113                                        | 58                                      | 80                                        | 51                                     | 213                                           | 5                                          |
| 92                                         | 71                                      | 128                                        | 118                                     | 80                                        | 123                                    | 51                                            | 3                                          |
| 88                                         | 55                                      | 150                                        | 115                                     | 104                                       | 37                                     | 149                                           | 5                                          |
| 143                                        | 84                                      | 99                                         | 63                                      | 113                                       | 36                                     | 86                                            | 12                                         |
| 97                                         | 56                                      | 88                                         | 56                                      | 54                                        | 135                                    | 96                                            | 4                                          |
| 131                                        | 84                                      | 107                                        | 60                                      | 91                                        | 86                                     | 67                                            | 5                                          |
| 138                                        | 77                                      | 117                                        | 50                                      | 94                                        | 64                                     | 126                                           | 3                                          |
| 68                                         | 147                                     | 71                                         | 59                                      | 97                                        | 62                                     | 60                                            | 7                                          |
| 68                                         | 69                                      | 160                                        | 167                                     | 117                                       | 67                                     | 98                                            | 2                                          |
| 63                                         | 58                                      | 81                                         | 72                                      | 147                                       | 97                                     | 104                                           | 2                                          |
| 38                                         | 101                                     | 114                                        | 111                                     | 104                                       | 38                                     | 73                                            | 3                                          |
| 103                                        | 38                                      | 123                                        | 141                                     | 121                                       | 55                                     | 85                                            | 1                                          |
| 109                                        | 47                                      | 79                                         | 106                                     | 105                                       | 120                                    | 127                                           | 4                                          |
| 98                                         | 49                                      | 141                                        | 127                                     | 106                                       | 82                                     | 86                                            | 2                                          |
| 64                                         | 114                                     | 97                                         | 173                                     | 151                                       | 53                                     | 79                                            | 2                                          |
| 139                                        | 84                                      | 86                                         | 104                                     | 133                                       | 128                                    | 86                                            | 5                                          |
| 103                                        | 133                                     | 88                                         |                                         | 129                                       | 83                                     |                                               | 2                                          |
| 116                                        | 159                                     |                                            |                                         |                                           |                                        |                                               |                                            |
| 133                                        | 5                                       |                                            |                                         |                                           |                                        |                                               |                                            |
| 31                                         | 131                                     |                                            |                                         |                                           |                                        |                                               |                                            |
| 85                                         | 80                                      |                                            |                                         |                                           |                                        |                                               |                                            |
| 144                                        | 112                                     |                                            |                                         |                                           |                                        |                                               |                                            |
| 83                                         | 100                                     |                                            |                                         |                                           |                                        |                                               |                                            |
| 82                                         | 111                                     |                                            |                                         |                                           |                                        |                                               |                                            |
| 77                                         | 66                                      |                                            |                                         |                                           |                                        |                                               |                                            |
| 70                                         | 99                                      |                                            |                                         |                                           |                                        |                                               |                                            |
| 92                                         | 85                                      |                                            |                                         |                                           |                                        |                                               |                                            |
| 147                                        | 113                                     |                                            |                                         |                                           |                                        |                                               |                                            |
| 98                                         | 92                                      |                                            |                                         |                                           |                                        |                                               |                                            |
| 128                                        | 91                                      |                                            |                                         |                                           |                                        |                                               |                                            |



## Supplementary Table 4

Inflammatory response of HD mice following chronic injection of hybrid g7-NPs-chol ("2-cycle treatment",  $N = 4/\text{group}$ ).

Analytes whose values are significantly different in zQ175DN+chol group compared to control group are in red boxes.

Data information: data are expressed as mean±SEM. Statistics: one-way ANOVA with Tuckey post-hoc test (\* $p < 0.05$ ; \*\* $p < 0.01$ ).

| Analyte     | Striatum (vs wt) |       |              |       | Cortex (vs wt) |       |              |       | Cerebellum (vs wt) |       |              |       |
|-------------|------------------|-------|--------------|-------|----------------|-------|--------------|-------|--------------------|-------|--------------|-------|
|             | zQ175DN          |       | zQ175DN+chol |       | zQ175DN        |       | zQ175DN+chol |       | zQ175DN            |       | zQ175DN+chol |       |
|             | Mean             | SEM   | Mean         | SEM   | Mean           | SEM   | Mean         | SEM   | Mean               | SEM   | Mean         | SEM   |
| IL-1a       | 0,722            | 0,056 | 0,667        | 0,000 | 0,778          | 0,064 | 0,556        | 0,064 | 0,895              | 0,053 | 1,053        | 0,086 |
| IL-1b       | 0,909            | 0,105 | 0,546        | 0,105 | 0,700          | 0,100 | 0,650        | 0,126 | 1,600              | 0,432 | 1,500        | 0,100 |
| IL-2        | 0,870            | 0,039 | 0,610        | 0,100 | 1,010          | 0,172 | 0,711        | 0,062 | 1,228              | 0,198 | 1,519        | 0,216 |
| IL-3        | N/D              |       | N/D          |       | N/D            |       | N/D          |       | N/D                |       | N/D          |       |
| IL-4        | N/D              |       | N/D          |       | N/D            |       | N/D          |       | N/D                |       | N/D          |       |
| IL-5        | 1,000            | 0,577 | 1,000        | 0,000 | 0,500          | 0,289 | 0,333        | 0,333 | 0,857              | 0,286 | 0,429        | 0,143 |
| IL-6        | 0,135            | 0,037 | 0,077        | 0,000 | 0,750          | 0,144 | 0,375        | 0,125 | 0,364              | 0,149 | 0,364        | 0,000 |
| IL-9        | 0,770            | 0,068 | 0,892        | 0,126 | 0,641          | 0,078 | 0,719        | 0,131 | 0,761              | 0,043 | 0,682        | 0,049 |
| IL-10       | 0,783            | 0,112 | 0,522        | 0,142 | 1,087          | 0,336 | 0,522        | 0,159 | 0,931              | 0,335 | 0,724        | 0,153 |
| IL-12 (p40) | 0,636            | 0,189 | 0,500        | 0,087 | 0,571          | 0,117 | 0,476        | 0,095 | 0,400              | 0,103 | 0,320        | 0,065 |
| IL-12 (p70) | 0,622            | 0,140 | 0,437        | 0,033 | 0,663          | 0,156 | 1,375        | 0,821 | 0,800              | 0,063 | 1,064        | 0,215 |
| IL-13       | 0,625            | 0,052 | 0,627        | 0,103 | 0,896          | 0,176 | 0,701        | 0,033 | 1,452              | 0,131 | 1,305        | 0,223 |
| IL-17       | 0,595            | 0,114 | 0,417        | 0,049 | 0,756          | 0,253 | 0,467        | 0,076 | 0,596              | 0,042 | 0,404        | 0,057 |
| Eotaxin     | 0,719            | 0,060 | 0,469 *      | 0,031 | 0,722          | 0,106 | 0,639        | 0,070 | 0,878              | 0,138 | 0,781        | 0,040 |
| G-CSF       | 0,849            | 0,121 | 0,636        | 0,091 | 0,500          | 0,000 | 0,750        | 0,250 | 0,467              | 0,128 | 0,533        | -     |
| GM-CSF      | 0,804            | 0,079 | 0,768        | 0,034 | 0,867          | 0,147 | 0,667        | 0,077 | 0,754              | 0,019 | 0,672        | 0,049 |
| ING-gamma   | 0,500            | 0,084 | 0,466        | 0,028 | 0,897          | 0,119 | 0,588        | 0,120 | 0,607              | 0,031 | 0,533        | 0,050 |
| KC          | 0,594            | 0,094 | 0,375 **     | 0,000 | 0,571          | 0,078 | 0,571        | 0,078 | 0,553              | 0,050 | 0,447 *      | 0,079 |
| MCP-1       | 0,068            | 0,005 | 0,093        | 0,017 | 0,899          | 0,232 | 0,930        | 0,250 | 0,843              | 0,126 | 0,825        | 0,127 |
| MIP-1a      | 1,047            | 0,114 | 1,043        | 0,117 | 1,167          | 0,271 | 0,892        | 0,113 | 0,713              | 0,116 | 0,629        | 0,117 |
| MIP-1b      | 0,737            | 0,048 | 0,618        | 0,142 | 0,909          | 0,235 | 0,212        | 0,030 | 0,518              | 0,080 | 0,304        | 0,042 |
| Rantes      | 0,680            | 0,067 | 0,530        | 0,075 | 0,983          | 0,178 | 1,017        | 0,144 | 1,388              | 0,194 | 1,327        | 0,212 |
| TNF-a       | 0,610            | 0,028 | 0,695        | 0,198 | 0,725          | 0,180 | 0,975        | 0,170 | 0,559              | 0,093 | 0,509        | 0,081 |

| Analyte     | Lung (vs wt) |       |              |       | Liver (vs wt) |       |              |       | Kidney (vs wt) |       |              |       |
|-------------|--------------|-------|--------------|-------|---------------|-------|--------------|-------|----------------|-------|--------------|-------|
|             | zQ175DN      |       | zQ175DN+chol |       | zQ175DN       |       | zQ175DN+chol |       | zQ175DN        |       | zQ175DN+chol |       |
|             | Mean         | SEM   | Mean         | SEM   | Mean          | SEM   | Mean         | SEM   | Mean           | SEM   | Mean         | SEM   |
| IL-1a       | N/D          |       | N/D          |       | 0,680         | 0,214 | 0,760        | 0,090 | 0,874          | 0,036 | 1,207        | 0,174 |
| IL-1b       | 0,667        | 0,000 | 0,667        | 0,000 | 1,200         | 0,300 | 0,900        | 0,000 | 1,167          | 0,167 | 1,000        | 0,000 |
| IL-2        | 0,692        | 0,000 | 1,578        | 0,451 | 1,447         | 0,417 | 1,303        | 0,224 | 0,919          | 0,193 | 0,730        | -     |
| IL-3        | N/D          |       | N/D          |       | N/D           |       | N/D          |       | N/D            |       | N/D          |       |
| IL-4        | N/D          |       | N/D          |       | N/D           |       | N/D          |       | N/D            |       | N/D          |       |
| IL-5        | 0,762        | 0,098 | 0,434        | 0,067 | 1,371         | 0,851 | 1,777        | 0,390 | 0,671          | 0,095 | 0,710        | 0,065 |
| IL-6        | 0,718        | 0,271 | 1,231        | 0,774 | 0,913         | 0,126 | 0,543        | 0,174 | 0,752          | 0,068 | 1,282        | 0,600 |
| IL-9        | 1,415        | 0,434 | 1,189        | 1,083 | 0,658         | 0,045 | 0,518        | 0,020 | 0,410          | 0,035 | 0,519        | -     |
| IL-10       | 1,000        | 0,406 | 0,878        | 0,378 | 0,734         | 0,008 | 0,677        | 0,000 | 1,104          | 0,203 | 0,816        | 0,190 |
| IL-12 (p40) | 0,998        | 0,000 | 0,998        | 0,003 | 0,992         | 0,001 | 0,986        | 0,015 | 0,996          | 0,005 | 0,993        | 0,006 |
| IL-12 (p70) | 0,858        | 0,024 | 1,135        | 0,256 | 1,028         | 0,054 | 0,942        | 0,111 | 0,818          | 0,091 | 0,679        | 0,032 |
| IL-13       | 0,998        | 0,141 | 0,977        | 0,028 | 1,023         | 0,064 | 0,524        | 0,213 | 0,637          | 0,565 | 1,290        | 0,113 |
| IL-17       | 0,889        | 0,222 | 0,833        | 0,096 | 0,583         | 0,083 | 1,000        | 0,250 | 0,667          | 0,000 | 0,778        | 0,111 |
| Eotaxin     | 0,728        | 0,264 | 0,779        | 0,222 | 0,847         | 0,086 | 0,824        | 0,272 | 0,810          | 0,160 | 0,625        | 0,089 |
| G-CSF       | 0,937        | 0,131 | 1,104        | 0,127 | 0,741         | 0,157 | 0,608        | 0,118 | 2,470          | 1,700 | 0,752        | 0,127 |
| GM-CSF      | 0,815        | 0,074 | 0,926        | 0,134 | 1,193         | 0,153 | 1,105        | 0,158 | 1,279          | 0,154 | 0,930        | 0,000 |
| ING-gamma   | 0,893        | 0,114 | 1,276        | 0,155 | 0,802         | 0,159 | 0,649        | 0,395 | 0,785          | 0,175 | 0,734        | 0,142 |
| KC          | 0,639        | 0,083 | 0,635        | 0,035 | 0,654         | 0,116 | 0,438 *      | 0,132 | 0,646          | 0,098 | 0,813        | 0,018 |
| MCP-1       | 1,153        | 0,133 | 1,063        | 0,509 | 0,905         | 0,171 | 0,947        | 0,213 | 0,924          | 0,104 | 0,930        | 0,174 |
| MIP-1a      | N/D          |       | N/D          |       | N/D           |       | N/D          |       | N/D            |       | N/D          |       |
| MIP-1b      | 0,638        | 0,185 | 0,185        | 0,021 | 0,816         | 0,037 | 0,521        | 0,160 | 1,024          | 0,397 | 1,250        | 0,541 |
| Rantes      | 0,743        | 0,257 | 1,004        | 0,075 | 0,944         | 0,100 | 0,738        | 0,310 | 1,141          | 0,131 | 1,227        | 0,272 |
| TNF-a       | 0,881        | 0,346 | 1,220        | 0,409 | 1,191         | 0,409 | 0,454        | 0,331 | 0,917          | 0,027 | 0,684        | -     |

| Analyte     | Spleen (vs wt) |       |              |       | Heart (vs wt) |       |              |       | Plasma (vs wt) |       |              |       |
|-------------|----------------|-------|--------------|-------|---------------|-------|--------------|-------|----------------|-------|--------------|-------|
|             | zQ175DN        |       | zQ175DN+chol |       | zQ175DN       |       | zQ175DN+chol |       | zQ175DN        |       | zQ175DN+chol |       |
|             | Mean           | SEM   | Mean         | SEM   | Mean          | SEM   | Mean         | SEM   | Mean           | SEM   | Mean         | SEM   |
| IL-1a       | 0,772          | 0,140 | 0,579        | 0,101 | 0,750         | 0,205 | 1,071        | 0,327 | 1,250          | 0,433 | 1,125        | 0,389 |
| IL-1b       | 1,208          | 0,386 | 1,198        | 0,361 | 0,735         | 0,062 | 0,525        | 0,149 | 1,387          | -     | 0,465        | 0,070 |
| IL-2        | 0,750          | 0,076 | 0,804        | 0,103 | 0,928         | 0,226 | 0,978        | 0,125 | 0,546          | -     | 1,455        | -     |
| IL-3        | N/D            |       | N/D          |       | N/D           |       | N/D          |       | N/D            |       | N/D          |       |
| IL-4        | N/D            |       | N/D          |       | N/D           |       | N/D          |       | N/D            |       | N/D          |       |
| IL-5        | N/D            |       | N/D          |       | 0,750         | 0,000 | 1,250        | 0,500 | 0,476          | 0,095 | 0,476        | 0,286 |
| IL-6        | 0,144          | 0,011 | 0,167        | 0,056 | 1,350         | 0,150 | 0,900        | 0,000 | 0,800          | 0,267 | 0,978        | 0,470 |
| IL-9        | 1,250          | 0,250 | 0,889        | 0,111 | 0,667         | 0,000 | 0,945        | 0,278 | 0,750          | 0,250 | 0,500        | -     |
| IL-10       | N/D            |       | N/D          |       | 1,115         | 0,366 | 0,847        | 0,191 | 0,667          | 0,273 | 0,404        | -     |
| IL-12 (p40) | N/D            |       | N/D          |       | N/D           |       | N/D          |       | N/D            |       | N/D          |       |
| IL-12 (p70) | 1,520          | 0,843 | 0,423        | 0,141 | 1,386         | 0,486 | 0,477        | 0,000 | 2,291          | 1,264 | 1,156        | 0,345 |
| IL-13       | 1,018          | 0,296 | 0,718        | 0,131 | 1,091         | 0,105 | 0,909        | 0,065 | 0,788          | 0,290 | 0,575        | 0,084 |
| IL-17       | 1,905          | 0,780 | 0,643        | 0,270 | 1,071         | 0,643 | 0,643        | 0,000 | 0,333          | -     | 0,556        | 0,222 |
| Eotaxin     | N/D            |       | N/D          |       | N/D           |       | N/D          |       | N/D            |       | N/D          |       |
| G-CSF       | 0,500          | 0,000 | 0,688        | 0,120 | 3,000         | 2,000 | 1,000        | 0,000 | 0,366          | -     | 1,162        | 0,791 |
| GM-CSF      | 1,282          | 0,303 | 1,016        | 0,071 | 0,989         | 0,033 | 0,935        | 0,042 | 1,062          | 0,122 | 0,943        | 0,035 |
| ING-gamma   | 0,866          | 0,082 | 0,698        | 0,119 | 3,118         | -     | 1,482        | 0,581 | 0,779          | 0,095 | 0,945        | 0,025 |
| KC          | 0,885          | 0,128 | 0,695        | 0,320 | 0,826         | 0,242 | 0,776        | 0,064 | 0,558          | 0,315 | 0,781        | 0,439 |
| MCP-1       | 0,921          | 0,020 | 0,927        | 0,091 | 0,919         | 0,029 | 0,740        | 0,048 | 0,619          | 0,095 | 0,582        | 0,018 |
| MIP-1a      | 1,000          | 0,250 | 0,656        | 0,054 | N/D           |       | N/D          |       | 0,667          | 0,381 | 0,429        | 0,143 |
| MIP-1b      | 0,956          | 0,163 | 1,014        | 0,330 | 0,801         | 0,082 | 0,852        | 0,048 | 2,652          | 0,967 | 1,605        | 0,310 |
| Rantes      | 2,097          | 0,768 | 0,247        | -     | 0,741         | 0,158 | 0,685        | 0,067 | 1,667          | 0,500 | 2,500        | 0,536 |
| TNF-a       | 1,087          | 0,513 | 1,017        | 0,402 | 0,845         | 0,027 | 0,938        | 0,177 | 1,229          | 0,263 | 0,836        | 0,296 |

## Supplementary Table 5

Complete blood count of wt and HD mice following systemic and chronic injection of hybrid g7-NPs-cholesterol ("2-cycle treatment",  $N = 5-6$ /group). R.I.= reference intervals.

Statistics: Kruskal-Wallis followed by Mann-Whitney test.

| Group        | Mouse ID | Sex    | RBC<br>( $10^4/\mu\text{L}$ ) | HGB<br>(g/L) | HCT<br>( $10^{\wedge}(-1)\%$ ) | MCV<br>( $10^{\wedge}(-1)\text{fL}$ ) | MCH<br>( $10^{\wedge}(-1)\text{pg}$ ) | MCHC<br>(g/L) | Erythrolysis | Anisocytosis |
|--------------|----------|--------|-------------------------------|--------------|--------------------------------|---------------------------------------|---------------------------------------|---------------|--------------|--------------|
| wt           | 4264     | Male   | 5,76                          | 7,7          | 27,2                           | 47,2                                  | 13,4                                  | 28,3          | +            |              |
| wt           | 4266     | Male   | 7,68                          | 10,7         | 36,4                           | 47,4                                  | 13,9                                  | 29,4          | n.o.         |              |
| wt           | 4267     | Male   | 8,18                          | 11,7         | 40,1                           | 49                                    | 14,3                                  | 29,2          | n.o.         |              |
| wt           | 4269     | Female | 8,84                          | 12,4         | 41,7                           | 47,2                                  | 14                                    | 29,7          | n.o.         |              |
| wt           | 4271     | Male   | 7,92                          | 11,1         | 38                             | 48                                    | 14                                    | 29,2          | n.o.         |              |
| wt           | 4276     | Female | 8,11                          | 11,2         | 37,9                           | 46,7                                  | 13,8                                  | 29,6          | n.o.         |              |
| zQ175DN      | 4268     | Female | 8,27                          | 11,2         | 40,3                           | 48,7                                  | 13,5                                  | 27,8          | n.o.         |              |
| zQ175DN      | 4274     | Female | 8,51                          | 11,2         | 39,3                           | 46,2                                  | 13,2                                  | 28,5          | n.o.         |              |
| zQ175DN      | 4277     | Female | 5,83                          | 7,8          | 28,1                           | 48,2                                  | 13,4                                  | 27,8          | +            |              |
| zQ175DN      | 4278     | Male   | 7,86                          | 11           | 38,6                           | 49,1                                  | 14                                    | 28,5          | +            |              |
| zQ175DN      | 4279     | Male   | 8,5                           | 11,6         | 40,6                           | 47,8                                  | 13,6                                  | 28,6          | n.o.         |              |
| zQ175DN      | 4280     | Male   | 8,69                          | 12,1         | 42,2                           | 48,6                                  | 13,9                                  | 28,7          | +            | slight       |
| zQ175DN+chol | 4389     | Male   | 8,68                          | 11,5         | 41,4                           | 47,7                                  | 13,2                                  | 27,8          | n.o.         |              |
| zQ175DN+chol | 4390     | Male   | 9,05                          | 12,1         | 42,7                           | 47,2                                  | 13,4                                  | 28,3          | n.o.         |              |
| zQ175DN+chol | 4391     | Male   | 7,89                          | 11           | 38,9                           | 49,3                                  | 13,9                                  | 28,3          | +            |              |
| zQ175DN+chol | 4394     | Female | 9,18                          | 12,2         | 41,8                           | 45,5                                  | 13,3                                  | 29,2          | +            |              |
| zQ175DN+chol | 4411     | Female | 8,13                          | 10,6         | 37,6                           | 46,8                                  | 13                                    | 28            | n.o.         |              |

|           |           |             |             |
|-----------|-----------|-------------|-------------|
| RI male   | 8.27-9.91 | 12.20-15.00 | 40.30-48.50 |
| RI female | 8.60-9.67 | 12.80-14.40 | 42.80-46.80 |

n.o.= not observed

| Group        | Mouse ID | Sex    | PLT<br>( $10^3/\mu\text{L}$ ) | PLT aggregates | RDW-CV<br>( $10^{\wedge}(-1)\%$ ) | WBC<br>( $10^3/\mu\text{L}$ ) | Neutrophils<br>( $\times 10^3/\mu\text{L}$ ) | Lymphocytes<br>( $\times 10^3/\mu\text{L}$ ) | Monocytes<br>( $\times 10^3/\mu\text{L}$ ) | Eosinophils<br>( $\times 10^3/\mu\text{L}$ ) | Epithelial cells |
|--------------|----------|--------|-------------------------------|----------------|-----------------------------------|-------------------------------|----------------------------------------------|----------------------------------------------|--------------------------------------------|----------------------------------------------|------------------|
| wt           | 4264     | Male   | 437                           | +              | 16,2                              | 4,45                          | 0,49                                         | 3,56                                         | 0,40                                       | 0,00                                         | n.o.             |
| wt           | 4266     | Male   | 268                           | +              | 19,2                              | 8,16                          | 0,24                                         | 7,83                                         | 0,08                                       | 0,00                                         | n.o.             |
| wt           | 4267     | Male   | 407                           | +++            | 19,7                              | 3,03                          | 0,67                                         | 2,27                                         | 0,06                                       | 0,03                                         | n.o.             |
| wt           | 4269     | Female | 170                           | -/+            | 18,9                              | 0,83                          | 0,09                                         | 0,63                                         | 0,11                                       | 0,00                                         | +                |
| wt           | 4271     | Male   | 129                           | -/+            | 19,1                              | 3,36                          | 0,60                                         | 2,65                                         | 0,10                                       | 0,00                                         | n.o.             |
| wt           | 4276     | Female | 189                           | +++            | 18,7                              | 1,3                           | 0,16                                         | 1,14                                         | 0,00                                       | 0,00                                         | +                |
| zQ175DN      | 4268     | Female | 197                           | -              | 19,9                              | 3,96                          | 0,71                                         | 3,17                                         | 0,08                                       | 0,00                                         | n.o.             |
| zQ175DN      | 4274     | Female | 198                           | ++             | 19                                | 2,27                          | 0,32                                         | 1,93                                         | 0,02                                       | 0,00                                         | n.o.             |
| zQ175DN      | 4277     | Female | 203                           | +++            | 16,4                              | 2,91                          | 0,44                                         | 2,33                                         | 0,15                                       | 0,00                                         | +                |
| zQ175DN      | 4278     | Male   | 157                           | +++            | 18,3                              | 6,92                          | 1,11                                         | 5,67                                         | 0,14                                       | 0,00                                         | n.o.             |
| zQ175DN      | 4279     | Male   | 492                           | ++             | 19,2                              | 5,27                          | 0,58                                         | 4,37                                         | 0,26                                       | 0,05                                         | +                |
| zQ175DN      | 4280     | Male   | 184                           | n.o.           | 19,4                              | 5,68                          | 0,6248                                       | 4,9984                                       | 0                                          | 0,0568                                       | +                |
| zQ175DN+chol | 4389     | Male   | 1426                          | +              | 19,7                              | 8,3                           | 0,25                                         | 7,97                                         | 0,08                                       | 0,00                                         | +                |
| zQ175DN+chol | 4390     | Male   | 598                           | -/+            | 19,9                              | 1,88                          | 0,11                                         | 1,77                                         | 0,00                                       | 0,00                                         | n.o.             |
| zQ175DN+chol | 4391     | Male   | 885                           | +              | 20,4                              | 11,11                         | 0,33                                         | 10,55                                        | 0,22                                       | 0,00                                         | +                |
| zQ175DN+chol | 4394     | Female | 651                           | ++             | 21,7                              | 1,2                           | 0,00                                         | 1,15                                         | 0,05                                       | 0,00                                         | +                |
| zQ175DN+chol | 4411     | Female | 260                           | -/+            | 19,7                              | 9,62                          | 1,84                                         | 7,50                                         | 0,48                                       | 0,00                                         | +                |

|                |
|----------------|
| 418.00-1187.00 |
| 157.00-939.00  |

|            |
|------------|
| 2.70-14.00 |
| 2.70-10.50 |

n.o.= not observed

## Supplementary Table 6

Blood chemistry of wt and HD mice following systemic and chronic injection of hybrid g7-NPs-chole (“2-cycle treatment”,  $N = 5-6/\text{group}$ ).  
CBC = complete blood count; R.I.= reference intervals.

Statistics: Kruskal-Wallis followed by Mann-Whitney test.

| Group        | Mouse ID | Sex    | Quantity of plasma (ul)   | Severity of hemolysis | Cholesterol | Triglycerids | Albumin        | Total proteins | Glucose | Creatinine | ALT | AST |  |
|--------------|----------|--------|---------------------------|-----------------------|-------------|--------------|----------------|----------------|---------|------------|-----|-----|--|
| wt           | 4264     | Male   | 120                       | +                     | 2,09        | 0,80         | 15             | 39             | 5,27    | 2,59       | 11  | 28  |  |
| wt           | 4266     | Male   | 135                       | +                     | 1,99        | 0,88         | 26             | 45             | 8,72    | 4,28       | 21  | 36  |  |
| wt           | 4267     | Male   | 250                       | ++                    | 2,07        | 1,35         | 28             | 53             | 8,60    | 4,22       | 42  | 86  |  |
| wt           | 4269     | Female | 190                       | ++                    | 1,78        | 1,13         | 27             | 49             | 10,66   | 5,23       | 45  | 83  |  |
| wt           | 4271     | Male   | 160                       | ++                    | 2,22        | 1,07         | 27             | 48             | 9,55    | 3,62       | 44  | 96  |  |
| wt           | 4276     | Female | 150                       | ++                    | 1,68        | 1,03         | 34             | 46             | 10,05   | 4,93       | 63  | 107 |  |
| zQ175DN      | 4268     | Female | 180                       | +                     | 2,04        | 0,60         | 32             | 48             | 12,93   | 6,35       | 50  | 87  |  |
| zQ175DN      | 4274     | Female | 65                        | ++                    | 2,15        | 0,99         | 28             | 38             | 5,16    | 2,53       | 39  | 84  |  |
| zQ175DN      | 4277     | Female | whole sample used for CBC |                       |             |              | insuff. sample |                |         |            |     |     |  |
| zQ175DN      | 4278     | Male   | 65                        | ++                    | 2,38        | 1,00         | 36             | 41             | 10,05   | 4,93       | 36  | 189 |  |
| zQ175DN      | 4279     | Male   | 260                       | ++                    | 2,30        | 0,63         | 24             | 49             | 10,05   | 4,93       | 33  | 111 |  |
| zQ175DN      | 4280     | Male   | 175                       | ++                    | 2,74        | 1,41         | 31             | 62             | 6,33    | 3,11       | 45  | 95  |  |
| zQ175DN+chol | 4389     | Male   | 260                       | +                     | 2,28        | 0,70         | 42             | 54             | 13,32   | 6,54       | 37  | 99  |  |
| zQ175DN+chol | 4390     | Male   | 250                       | +                     | 2,20        | 0,54         | 41             | 48             | 10,49   | 5,15       | 52  | 110 |  |
| zQ175DN+chol | 4391     | Male   | 175                       | +                     | 1,89        | 0,86         | insuff. sample | 51             | 7,94    | 3,90       | 138 | 253 |  |
| zQ175DN+chol | 4394     | Female | 450                       | +                     | 1,71        | 0,51         | 47             | 51             | 9,49    | 4,66       | 36  | 73  |  |
| zQ175DN+chol | 4411     | Female | 80                        | +                     | 2,51        | 1,16         | insuff. sample | 45             | 9,10    | 4,47       | 45  | 187 |  |

  

|           |         |         |       |       |          |          |       |        |
|-----------|---------|---------|-------|-------|----------|----------|-------|--------|
| RI male   | 1.6-2.3 | 0.8-1.2 | 23-25 | 57-60 | 6.3-10.5 | 8.8-17.7 | 39-65 | 56-104 |
| RI female | 1.3-1.8 | 0.5-0.9 | 22-25 | 54-59 | 6.2-11.6 | 7.9-9.7  | 45-58 | 66-120 |

## Supplementary Table 7

Body weight and weight of organs in grams of wt and HD mice following systemic and chronic injection of hybrid g7-NPs-chol ("2-cycle treatment",  $N = 5-6/\text{group}$ ).

Statistics: Kruskal-Wallis followed by Mann-Whitney test.

| Group        | Mouse ID | Sex    | Weight (g) |       |        |             |              |       |             |              |
|--------------|----------|--------|------------|-------|--------|-------------|--------------|-------|-------------|--------------|
|              |          |        | Body       | Liver | Spleen | Left kidney | Right kidney | Heart | Left testis | Right testis |
| wt           | 4264     | Male   | 28,7       | 1,680 | 0,107  | 0,348       | 0,773        | 0,215 | 0,083       | 0,090        |
| wt           | 4266     | Male   | 31,1       | 1,603 | 0,087  | 0,207       | 0,190        | 0,159 | 0,090       | 0,086        |
| wt           | 4267     | Male   | 32,2       | 1,715 | 0,096  | 0,226       | 0,220        | 0,205 | 0,093       | 0,087        |
| wt           | 4269     | Female | 27,7       | 1,554 | 0,120  | 0,182       | 0,176        | 0,153 | /           | /            |
| wt           | 4271     | Male   | 36,4       | 1,910 | 0,092  | 0,238       | 0,235        | 0,243 | 0,102       | 0,113        |
| wt           | 4276     | Female | 26,7       | 1,455 | 0,112  | 0,141       | 0,161        | 0,187 | /           | /            |
| zQ175DN      | 4268     | Female | 22,3       | 1,087 | 0,117  | 0,126       | 0,140        | 0,136 | /           | /            |
| zQ175DN      | 4274     | Female | 22,2       | 1,129 | 0,096  | 0,133       | 0,132        | 0,144 | /           | /            |
| zQ175DN      | 4277     | Female | 22,8       | 1,168 | 0,113  | 0,141       | 0,142        | 0,130 | /           | /            |
| zQ175DN      | 4278     | Male   | 26,7       | 1,417 | 0,072  | 0,167       | 0,168        | 0,139 | 0,092       | 0,092        |
| zQ175DN      | 4279     | Male   | 29,3       | 1,542 | 0,083  | 0,171       | 0,182        | 0,144 | 0,100       | 0,108        |
| zQ175DN      | 4280     | Male   | 32,0       | 1,637 | 0,080  | 0,197       | 0,208        | 0,191 | 0,096       | 0,091        |
| zQ175DN+chol | 4389     | Male   | 26,3       | 1,375 | 0,063  | 0,144       | 0,150        | 0,141 | 0,088       | 0,111        |
| zQ175DN+chol | 4390     | Male   | 25,4       | 1,415 | 0,094  | 0,162       | 0,170        | 0,149 | 0,100       | 0,091        |
| zQ175DN+chol | 4391     | Male   | 25,4       | 1,021 | 0,095  | 0,205       | 0,221        | 0,165 | 0,090       | 0,090        |
| zQ175DN+chol | 4394     | Female | 20,8       | 1,180 | 0,116  | 0,127       | 0,127        | 0,124 | /           | /            |
| zQ175DN+chol | 4411     | Female | 20,8       | 1,158 | 0,096  | 0,129       | 0,129        | 0,116 | /           | /            |

## Supplementary Table 8

Summary of gross and histological lesions of wt and HD mice following systemic and chronic injection of hybrid g7-NPs-cholesterol ("2-cycle treatment", *N* = 5-6/group).

|                                                                 | wt  | zQ175DN | zQ175DN+chol |
|-----------------------------------------------------------------|-----|---------|--------------|
| Heart, myocardial mineralizations                               | 1/6 | 2/6     | 0/5          |
| Lung, perivascular/peribronchial lymphoplasmacytic infiltrate   | 6/6 | 4/6     | 5/5          |
| Lung, acidophilic macrophage pneumonia                          | 3/6 | 3/6     | 5/5          |
| Testes, residual bodies                                         | 2/4 | 3/3     | 3/3          |
| Uterus, cystic endometrial hyperplasia                          | 2/2 | 3/3     | 2/2          |
| Ovary, periovaric lymphocytic infiltrates                       | 0/2 | 2/3     | 1/2          |
| Liver, multifocal neutrophilic and lymphoplasmacytic infiltrate | 6/6 | 5/6     | 4/5          |
| Kidney, hydronephrosis                                          | 1/6 | 0/6     | 0/5          |
| Kidney, polycystic                                              | 1/6 | 0/6     | 0/5          |
| Kidney, peripelvic lymphoplasmacytic infiltrates                | 5/6 | 4/6     | 3/5          |
| Kidney, interstitial lymphoplasmacytic infiltrates              | 3/6 | 1/6     | 0/5          |
| Kidney, intratubular hyaline casts                              | 1/6 | 4/6     | 2/5          |
| Spleen, white pulp hyperplasia                                  | 5/6 | 6/6     | 4/5          |
| Spleen, hemosiderosis                                           | 2/6 | 2/6     | 2/5          |
| Spleen, extramedullary hematopoiesis                            | 3/6 | 3/6     | 3/5          |
| Salivary glands, lymphoplasmacytic infiltrates                  | 5/6 | 6/6     | 5/5          |
| Lymph nodes, hyperplasia                                        | 4/6 | 6/6     | 2/5          |
| Lymph nodes, sinus histiocytosis                                | 3/6 | 5/6     | 3/5          |

## Supplementary Table 9

Foreign body granuloma analysis of HD mice following systemic and chronic injection of hybrid g7-NPs-chol for all the treatments.

| Type of NPs   | N° of IP injections | Weeks after the last IP | N° of nodules         | Concretions diameter |
|---------------|---------------------|-------------------------|-----------------------|----------------------|
| g7-hybrid-NPs | 10                  | 20                      | 1 (not in all mice)   | 1-2 mm               |
| g7-hybrid-NPs | 10                  | 40                      | 1-2 (not in all mice) | 1-2 mm               |
| g7-hybrid-NPs | 10 + 10 (2 cycles)  | 20                      | 5-6 (in all mice)     | 2-3 mm               |
